# Supplementary material for: Fine-tuning of optical band gap in mixed halide aziridinium lead perovskites
Source: Royal Society of Chemistry journal article supplement (doi:10.1039/d4dt02879a), 2024-11-29
Supplement: d4dt02879a1.pdf [file d4dt02879a1.pdf]

### Fine tuning of optical band gap in mixed halide aziridinium lead perovskites

Olesia I. Kucheriv,<sup>a</sup> Dmytro A. Haleliuk,<sup>a</sup> Sergiu Shova,<sup>b</sup> Il'ya A. Gural'skiy\*<sup>a</sup>

<sup>a</sup> Department of Chemistry, Taras Shevchenko National University of Kyiv, Volodymyrska St. 64, 01601 Kyiv, Ukraine. E-mail: illia.guralskiy@univ.kiev.ua

<sup>b</sup> Department of Inorganic Polymers, "Petru Poni" Institute of Macromolecular Chemistry, 41A Aleea Gr. Ghica Voda, 700487 Iasi, Romania

**Table S1.** Goldschmidt's tolerance factors for **(AzrH)PbBr<sub>x</sub>I<sub>3-x</sub>** mixed halide perovskites.

| $x_{\text{Br}}$ | $t$   |
|-----------------|-------|
| 0.04            | 0.939 |
| 0.09            | 0.939 |
| 0.85            | 0.943 |
| 1.96            | 0.950 |
| 2.01            | 0.950 |
| 2.08            | 0.951 |
| 2.79            | 0.955 |

Values of effective atomic radii used for the calculations:

| Ion               | Radius (Å) |
|-------------------|------------|
| Pb <sup>2+</sup>  | 1.19       |
| Br <sup>-</sup>   | 1.96       |
| I <sup>-</sup>    | 2.2        |
| AzrH <sup>+</sup> | 2.30       |

$r_{\text{Xeff}}$  was calculated from  $r(\text{Br}^-)$ ,  $r(\text{I}^-)$  and content of the corresponding halides in **(AzrH)PbBr<sub>x</sub>I<sub>3-x</sub>** products:

| $x_{\text{Br}}$ | $x_{\text{I}}$ | Radius (Å) |
|-----------------|----------------|------------|
| 0.04            | 2.96           | 2.20       |
| 0.09            | 2.91           | 2.19       |
| 0.85            | 2.15           | 2.13       |
| 1.96            | 1.04           | 2.04       |
| 2.01            | 0.99           | 2.04       |
| 2.08            | 0.92           | 2.03       |
| 2.79            | 0.21           | 1.98       |

## Crystallographic tables

**Table S2.1** Crystal data and structure refinement for (AzrH)PbBr<sub>0.04</sub>I<sub>2.96</sub>

|                                        |                                                         |
|----------------------------------------|---------------------------------------------------------|
| Empirical formula                      | Br <sub>0.04</sub> C <sub>2</sub> I <sub>2.96</sub> NPb |
| Formula weight                         | 624.04                                                  |
| Temperature/K                          | 250                                                     |
| Crystal system                         | cubic                                                   |
| Space group                            | <i>Pm</i> $\bar{3}$ <i>m</i>                            |
| a/Å                                    | 6.35060(10)                                             |
| Volume/Å <sup>3</sup>                  | 256.120(12)                                             |
| Z                                      | 1                                                       |
| $\rho_{\text{calc}}$ /cm <sup>3</sup>  | 4.046                                                   |
| $\mu$ /mm <sup>-1</sup>                | 25.466                                                  |
| Crystal size/mm <sup>3</sup>           | 0.8 × 0.5 × 0.1                                         |
| Radiation                              | Mo K $\alpha$ ( $\lambda$ = 0.71073)                    |
| 2 $\theta$ range for data collection/° | 6.416 to 61.71                                          |
| Reflections collected                  | 287                                                     |
| Independent reflections                | 287 [ $R_{\text{sigma}}$ = 0.0090]                      |
| Data/restraints/parameters             | 287/2/9                                                 |
| Goodness-of-fit on F <sup>2</sup>      | 1.132                                                   |
| R <sub>1</sub> [ $I > 2\sigma(I)$ ]    | 0.0300                                                  |
| wR <sub>2</sub> [all data]             | 0.0861                                                  |

**Table S2.2** Bond Lengths for (AzrH)PbBr<sub>0.04</sub>I<sub>2.96</sub>

|                    | Length/Å   |
|--------------------|------------|
| Pb1–Br1            | 3.17530(5) |
| Pb1–I1             | 3.17530(5) |
| C1–N1 <sup>1</sup> | 1.43(3)    |
| C1–C1 <sup>2</sup> | 1.45(3)    |

<sup>1</sup>+ z, + x, + y; <sup>2</sup>– x, – y, – z;

**Table S2.3** Bond Angles for (AzrH)PbBr<sub>0.04</sub>I<sub>2.96</sub>

|                                     | Angle/°  |
|-------------------------------------|----------|
| Br1 <sup>1</sup> –Pb1–Br1           | 90.0     |
| Br1–Pb1–Br1 <sup>2</sup>            | 180.0    |
| I1–Pb1–Br1 <sup>3</sup>             | 90.0     |
| I1–Pb1–Br1 <sup>2</sup>             | 180.0    |
| Pb1 <sup>5</sup> –Br1–Pb1           | 180.0    |
| Pb1 <sup>5</sup> –I1–Pb1            | 180.0    |
| C1 <sup>7</sup> –N1–C1 <sup>4</sup> | 61(2)    |
| N1 <sup>8</sup> –C1–C1 <sup>6</sup> | 59.6(11) |

<sup>1</sup>+ y, + z, 1 + x; <sup>2</sup>1 + x, + y, + z; <sup>3</sup>+ z, 1 + x, + y; <sup>4</sup>+ y, + z, + x; <sup>5</sup>– 1 + x, + y, + z; <sup>6</sup>– x, – y, – z; <sup>7</sup>– y, – z, – x; <sup>8</sup>+ z, – x, – y

**Table S3.1** Crystal data and structure refinement for (AzrH)PbBr<sub>0.09</sub>I<sub>2.91</sub>

|                                        |                                                                 |
|----------------------------------------|-----------------------------------------------------------------|
| Empirical formula                      | Br <sub>0.09</sub> C <sub>2</sub> I <sub>2.91</sub> NPb         |
| Formula weight                         | 621.69                                                          |
| Temperature/K                          | 250                                                             |
| Crystal system                         | cubic                                                           |
| Space group                            | <i>Pm</i> $\bar{3}$ <i>m</i>                                    |
| a/Å                                    | 6.33861(18)                                                     |
| Volume/Å <sup>3</sup>                  | 254.67(2)                                                       |
| Z                                      | 1                                                               |
| $\rho_{\text{calc}}/\text{cm}^3$       | 4.054                                                           |
| $\mu/\text{mm}^{-1}$                   | 25.655                                                          |
| Crystal size/mm <sup>3</sup>           | 0.12 × 0.08 × 0.07                                              |
| Radiation                              | Mo K $\alpha$ ( $\lambda = 0.71073$ )                           |
| 2 $\theta$ range for data collection/° | 6.428 to 59.358                                                 |
| Reflections collected                  | 1083                                                            |
| Independent reflections                | 104 [ $R_{\text{int}} = 0.0195$ , $R_{\text{sigma}} = 0.0101$ ] |
| Data/restraints/parameters             | 104/2/9                                                         |
| Goodness-of-fit on F <sup>2</sup>      | 1.250                                                           |
| R <sub>1</sub> [ $I \geq 2\sigma(I)$ ] | 0.0140,                                                         |
| wR <sub>2</sub> [all data]             | 0.0428                                                          |

**Table S3.2** Bond Lengths for (AzrH)PbBr<sub>0.09</sub>I<sub>2.91</sub>

|                    | Length/Å   |
|--------------------|------------|
| Pb1–I1             | 3.16931(9) |
| Pb1–Br1            | 3.16931(9) |
| C1–C1 <sup>1</sup> | 1.45(2)    |
| C1–N1 <sup>2</sup> | 1.42(2)    |

<sup>1</sup> – 1 – x, 1 – y, – 1 – z; <sup>2</sup> + x, – z, – 1 + y.

**Table S3.3** Bond Angles for (AzrH)PbBr<sub>0.09</sub>I<sub>2.91</sub>

|                                      | Angle/°  |
|--------------------------------------|----------|
| I1 <sup>1</sup> –Pb1–I1              | 90.0     |
| I1 <sup>1</sup> –Pb1–I1 <sup>4</sup> | 180.0    |
| Br1–Pb1–I1 <sup>3</sup>              | 90.0     |
| Br1–Pb1–I1 <sup>2</sup>              | 180.0    |
| Pb1 <sup>5</sup> –I1–Pb1             | 180.0    |
| N1 <sup>9</sup> –C1–C1 <sup>8</sup>  | 59.3(7)  |
| C1 <sup>6</sup> –N1–C1 <sup>7</sup>  | 61.3(14) |
| Pb1 <sup>5</sup> –Br1–Pb1            | 180.0    |

<sup>1</sup> + x, – z, + y; <sup>2</sup> + x, – 1 + y, + z; <sup>3</sup> – y, + x, + z; <sup>4</sup> + x, – z, – 1 + y; <sup>5</sup> + x, 1 + y, + z; <sup>6</sup> – 1 – x, 1 + z, – y; <sup>7</sup> – y, – z, + x; <sup>8</sup> – 1 – x, 1 – y, – 1 – z; <sup>9</sup> – 1 – z, 1 – y, + x.

**Table S4.1** Crystal data and structure refinement for (AzrH)PbBr<sub>0.85</sub>I<sub>2.15</sub>

|                                        |                                                         |
|----------------------------------------|---------------------------------------------------------|
| Empirical formula                      | Br <sub>0.85</sub> C <sub>2</sub> I <sub>2.15</sub> NPb |
| Formula weight                         | 585.98                                                  |
| Temperature/K                          | 293                                                     |
| Crystal system                         | cubic                                                   |
| Space group                            | <i>Pm</i> $\bar{3}$ <i>m</i>                            |
| a/Å                                    | 6.2570(2)                                               |
| Volume/Å <sup>3</sup>                  | 244.96(2)                                               |
| Z                                      | 1                                                       |
| $\rho_{\text{calc}}/\text{cm}^3$       | 3.972                                                   |
| $\mu/\text{mm}^{-1}$                   | 90.091                                                  |
| Crystal size/mm <sup>3</sup>           | 0.1 × 0.06 × 0.05                                       |
| Radiation                              | Cu K $\alpha$ ( $\lambda = 1.54184$ )                   |
| 2 $\theta$ range for data collection/° | 14.154 to 142.308                                       |
| Reflections collected                  | 195                                                     |
| Independent reflections                | 195 [ $R_{\text{sigma}} = 0.0187$ ]                     |
| Data/restraints/parameters             | 195/2/9                                                 |
| Goodness-of-fit on F <sup>2</sup>      | 1.185                                                   |
| R <sub>1</sub> [ $I \geq 2\sigma(I)$ ] | 0.0663                                                  |
| wR <sub>2</sub> [all data]             | 0.1852                                                  |

**Table S4.2** Bond Lengths for (AzrH)PbBr<sub>0.85</sub>I<sub>2.15</sub>

|                                  | Length/Å    |
|----------------------------------|-------------|
| Pb1–I1                           | 3.12850(10) |
| Pb1–Br1                          | 3.12850(10) |
| C1 <sup>1</sup> –N1 <sup>3</sup> | 1.44(3)     |
| C1 <sup>1</sup> –C1 <sup>2</sup> | 1.45(4)     |

<sup>1</sup> + z, - x, - y; <sup>2</sup> + z, + x, + y; <sup>3</sup> + y, + z, + x.

**Table S4.3** Bond Angles for (AzrH)PbBr<sub>0.85</sub>I<sub>2.15</sub>

|                                     | Angle/° |
|-------------------------------------|---------|
| Br1 <sup>1</sup> –Pb1–Br1           | 90.0    |
| Br1–Pb1–Br1 <sup>2</sup>            | 180.0   |
| I1–Pb1–Br1 <sup>3</sup>             | 90.0    |
| I1–Pb1–Br1 <sup>2</sup>             | 180.0   |
| Pb1 <sup>4</sup> –Br1–Pb1           | 180.0   |
| Pb1 <sup>4</sup> –I1–Pb1            | 180.0   |
| C1 <sup>3</sup> –N1–C1 <sup>5</sup> | 60(2)   |

<sup>1</sup> + y, 1 + z, + x; <sup>2</sup> + x, + y, 1 + z; <sup>3</sup> + y, + z, + x; <sup>4</sup> + x, + y, -1 + z; <sup>5</sup> - y, + z, - x;

**Table S5.1** Crystal data and structure refinement for (AzrH)PbBr<sub>1.96</sub>I<sub>1.04</sub>

|                                        |                                                                |
|----------------------------------------|----------------------------------------------------------------|
| Empirical formula                      | Br <sub>1.96</sub> C <sub>2</sub> I <sub>1.04</sub> NPb        |
| Formula weight                         | 533.82                                                         |
| Temperature/K                          | 230                                                            |
| Crystal system                         | cubic                                                          |
| Space group                            | <i>Pm</i> $\bar{3}$ <i>m</i>                                   |
| a/Å                                    | 6.10960(10)                                                    |
| Volume/Å <sup>3</sup>                  | 228.054(11)                                                    |
| Z                                      | 1                                                              |
| $\rho_{\text{calc}}/\text{cm}^3$       | 3.887                                                          |
| $\mu/\text{mm}^{-1}$                   | 72.969                                                         |
| Crystal size/mm <sup>3</sup>           | 0.08 × 0.05 × 0.05                                             |
| Radiation                              | Cu K $\alpha$ ( $\lambda = 1.54184$ )                          |
| 2 $\theta$ range for data collection/° | 14.498 to 141.558                                              |
| Reflections collected                  | 570                                                            |
| Independent reflections                | 69 [ $R_{\text{int}} = 0.0174$ , $R_{\text{sigma}} = 0.0079$ ] |
| Data/restraints/parameters             | 69/2/9                                                         |
| Goodness-of-fit on F <sup>2</sup>      | 1.227                                                          |
| R <sub>1</sub> [ $I \geq 2\sigma(I)$ ] | 0.0171                                                         |
| wR <sub>2</sub> [all data]             | 0.0578                                                         |

**Table S5.2** Bond Lengths for (AzrH)PbBr<sub>1.96</sub>I<sub>1.04</sub>

|                                  | Length/Å   |
|----------------------------------|------------|
| Pb1–I1                           | 3.05480(5) |
| Pb1–Br1                          | 3.05480(5) |
| C1 <sup>1</sup> –N1              | 1.43(2)    |
| C1 <sup>1</sup> –C1 <sup>2</sup> | 1.45(2)    |

<sup>1</sup> + x, 1 – z, 1 + y; <sup>2</sup> + x, – 1 + z, 1 – y.

**Table S5.3** Bond Angles for (AzrH)PbBr<sub>1.96</sub>I<sub>1.04</sub>

|                                        | Angle/°  |
|----------------------------------------|----------|
| Br1 <sup>1</sup> –Pb1–Br1              | 90.0     |
| Br1 <sup>1</sup> –Pb1–Br1 <sup>3</sup> | 180.0    |
| I1–Pb1–Br1 <sup>2</sup>                | 90.0     |
| Pb1 <sup>4</sup> –Br1–Pb1              | 180.0    |
| Pb1 <sup>4</sup> –I1–Pb1               | 180.0    |
| C1 <sup>10</sup> –N1–C1 <sup>5</sup>   | 61.1(14) |

<sup>1</sup> 1 + y, + z, + x; <sup>2</sup> + z, + x, + y; <sup>3</sup> + y, + z, + x; <sup>4</sup> + x, – 1 + y, + z; <sup>5</sup> – y, 1 – z, 1 – x; <sup>6</sup> + y, – 1 + z, 1 + x.

**Table S6.1** Crystal data and structure refinement for (AzrH)PbBr<sub>2.01</sub>I<sub>0.99</sub>

|                                        |                                                         |
|----------------------------------------|---------------------------------------------------------|
| Empirical formula                      | Br <sub>2.01</sub> C <sub>2</sub> I <sub>0.99</sub> NPb |
| Formula weight                         | 531.47                                                  |
| Temperature/K                          | 293                                                     |
| Crystal system                         | cubic                                                   |
| Space group                            | <i>Pm</i> $\bar{3}$ <i>m</i>                            |
| a/Å                                    | 6.0891(2)                                               |
| Volume/Å <sup>3</sup>                  | 225.77(2)                                               |
| Z                                      | 1                                                       |
| $\rho_{\text{calc}}/\text{cm}^3$       | 3.909                                                   |
| $\mu/\text{mm}^{-1}$                   | 30.871                                                  |
| Crystal size/mm <sup>3</sup>           | 0.14 × 0.1 × 0.04                                       |
| Radiation                              | Mo K $\alpha$ ( $\lambda = 0.71073$ )                   |
| 2 $\theta$ range for data collection/° | 6.692 to 57.996                                         |
| Reflections collected                  | 232                                                     |
| Independent reflections                | 232 [ $R_{\text{sigma}} = 0.0411$ ]                     |
| Data/restraints/parameters             | 232/1/9                                                 |
| Goodness-of-fit on F <sup>2</sup>      | 1.001                                                   |
| R <sub>1</sub> [ $I \geq 2\sigma(I)$ ] | 0.0353                                                  |
| wR <sub>2</sub> [all data]             | 0.0847                                                  |

**Table S6.2** Bond Lengths for (AzrH)PbBr<sub>2.01</sub>I<sub>0.99</sub>

|                    | Length/Å    |
|--------------------|-------------|
| Pb1–I1             | 3.04455(10) |
| Pb1–Br1            | 3.04455(10) |
| C1–N1              | 1.42(3)     |
| C1–C1 <sup>1</sup> | 1.45(14)    |

<sup>1</sup> – x, – y, – z.

**Table S6.3** Bond Angles for (AzrH)PbBr<sub>2.01</sub>I<sub>0.99</sub>

|                                        | Angle/° |
|----------------------------------------|---------|
| Br1 <sup>1</sup> –Pb1–Br1              | 90.0    |
| Br1 <sup>1</sup> –Pb1–Br1 <sup>2</sup> | 180.0   |
| I1–Pb1–Br1 <sup>2</sup>                | 90.0    |
| I1–Pb1–Br1 <sup>3</sup>                | 180.0   |
| Pb1 <sup>4</sup> –Br1–Pb1              | 180.0   |
| Pb1 <sup>4</sup> –I1–Pb1               | 180.0   |
| C1–N1–C1 <sup>9</sup>                  | 62(7)   |
| N1–C1–C1 <sup>9</sup>                  | 59(3)   |

<sup>1</sup> + y, 1 + z, + x; <sup>2</sup> + y, + z, + x; <sup>3</sup> + x, + y, 1 + z; <sup>4</sup> + x, + y, – 1 + z; <sup>5</sup> – x, – y, – z.

**Table S7.1** Crystal data and structure refinement for (AzrH)PbBr<sub>2.08</sub>I<sub>0.92</sub>

|                                        |                                                                |
|----------------------------------------|----------------------------------------------------------------|
| Empirical formula                      | Br <sub>2.08</sub> C <sub>2</sub> I <sub>0.92</sub> NPb        |
| Formula weight                         | 528.18                                                         |
| Temperature/K                          | 250                                                            |
| Crystal system                         | cubic                                                          |
| Space group                            | <i>Pm</i> $\bar{3}$ <i>m</i>                                   |
| a/Å                                    | 6.0775(3)                                                      |
| Volume/Å <sup>3</sup>                  | 224.48(3)                                                      |
| Z                                      | 1                                                              |
| $\rho_{\text{calc}}/\text{cm}^3$       | 3.907                                                          |
| $\mu/\text{mm}^{-1}$                   | 31.118                                                         |
| Crystal size/mm <sup>3</sup>           | 0.1 × 0.08 × 0.06                                              |
| Radiation                              | Mo K $\alpha$ ( $\lambda = 0.71073$ )                          |
| 2 $\theta$ range for data collection/° | 6.704 to 58.578                                                |
| Reflections collected                  | 379                                                            |
| Independent reflections                | 83 [ $R_{\text{int}} = 0.0243$ , $R_{\text{sigma}} = 0.0160$ ] |
| Data/restraints/parameters             | 83/3/10                                                        |
| Goodness-of-fit on F <sup>2</sup>      | 1.116                                                          |
| R <sub>1</sub> [ $I \geq 2\sigma(I)$ ] | 0.0176                                                         |
| wR <sub>2</sub> [all data]             | 0.0423                                                         |

**Table S7.2** Bond Lengths for (AzrH)PbBr<sub>2.08</sub>I<sub>0.92</sub>

|                                  | Length/Å    |
|----------------------------------|-------------|
| Pb1–I1                           | 3.03875(15) |
| Pb1–Br1                          | 3.03875(15) |
| C1 <sup>1</sup> –N1              | 1.433(15)   |
| C1 <sup>1</sup> –C1 <sup>2</sup> | 1.466(15)   |

<sup>1</sup> – z, + y, + x; <sup>2</sup> – y, + z, – x.

**Table S7.3** Bond Angles for (AzrH)PbBr<sub>2.08</sub>I<sub>0.92</sub>

|                                      | Angle/°  |
|--------------------------------------|----------|
| Br1–Pb1–Br1 <sup>2</sup>             | 90.0     |
| Br1–Pb1–Br1 <sup>1</sup>             | 180.0    |
| I1–Pb1–Br1 <sup>1</sup>              | 180.0    |
| Pb1 <sup>3</sup> –Br1–Pb1            | 180.0    |
| Pb1 <sup>3</sup> –I1–Pb1             | 180.0    |
| C11 <sup>1</sup> –N1–C1 <sup>4</sup> | 61.1(15) |

<sup>1</sup> + x, 1 + y, + z; <sup>2</sup> + y, + z, + x; <sup>3</sup> + x, – 1 + y, + z; <sup>4</sup> – y, + z, – x.

**Table S8.1** Crystal data and structure refinement for (AzrH)PbBr<sub>2.79</sub>I<sub>0.21</sub>

|                                        |                                                                |
|----------------------------------------|----------------------------------------------------------------|
| Empirical formula                      | Br <sub>2.8</sub> C <sub>2</sub> I <sub>0.2</sub> NPb          |
| Formula weight                         | 494.35                                                         |
| Temperature/K                          | 293                                                            |
| Crystal system                         | cubic                                                          |
| Space group                            | <i>Pm</i> $\bar{3}$ <i>m</i>                                   |
| a/Å                                    | 5.9968(3)                                                      |
| Volume/Å <sup>3</sup>                  | 215.65(3)                                                      |
| Z                                      | 1                                                              |
| $\rho_{\text{calc}}/\text{cm}^3$       | 3.806                                                          |
| $\mu/\text{mm}^{-1}$                   | 58.117                                                         |
| Crystal size/mm <sup>3</sup>           | 0.14 × 0.08 × 0.07                                             |
| Radiation                              | Cu K $\alpha$ ( $\lambda = 1.54184$ )                          |
| 2 $\theta$ range for data collection/° | 14.772 to 141.708                                              |
| Reflections collected                  | 169                                                            |
| Independent reflections                | 65 [ $R_{\text{int}} = 0.0386$ , $R_{\text{sigma}} = 0.0259$ ] |
| Data/restraints/parameters             | 65/2/8                                                         |
| Goodness-of-fit on F <sup>2</sup>      | 1.174                                                          |
| R <sub>1</sub> [ $I \geq 2\sigma(I)$ ] | 0.0437                                                         |
| wR <sub>2</sub> [all data]             | 0.0437                                                         |

**Table S8.2** Bond Lengths for (AzrH)PbBr<sub>2.79</sub>I<sub>0.21</sub>

|                                  | Length/Å    |
|----------------------------------|-------------|
| Pb1–I1                           | 2.99840(15) |
| Pb1–Br1                          | 2.99840(15) |
| C1 <sup>1</sup> –N1              | 1.45(2)     |
| C1 <sup>1</sup> –C1 <sup>2</sup> | 1.45(2)     |

<sup>1</sup> – y, + x, + z; <sup>2</sup> + y, – x, + z.

**Table S8.3** Bond Angles for (AzrH)PbBr<sub>2.79</sub>I<sub>0.21</sub>

|                                     | Angle/°  |
|-------------------------------------|----------|
| Br1 <sup>1</sup> –Pb1–Br1           | 90.0     |
| Br1–Pb1–Br1 <sup>4</sup>            | 180.0    |
| I1–Pb1–Br1 <sup>2</sup>             | 90.0     |
| I1–Pb1–Br1 <sup>4</sup>             | 180.0    |
| Pb1 <sup>5</sup> –Br1–Pb1           | 180.0    |
| C1 <sup>6</sup> –N1–C1 <sup>3</sup> | 60.1(14) |

<sup>1</sup> + y, + z, 1 + x; <sup>2</sup> + y, + z, + x; <sup>3</sup> + z, + x, + y; <sup>4</sup> 1 + x, + y, + z; <sup>5</sup> – 1 + x, + y, + z; <sup>6</sup> – z, – x, – y.
